# Supplementary material
Source: ML conference proceedings conference paper supplement (https://proceedings.mlr.press/v70/shrivastava17a.html)
Supplement: Supplementary file 1 [file shrivastava17a-supp.pdf]

## A. Proofs

**Theorem 5** Give any two finite sets  $S_1, S_2 \in \Omega$ , with  $A = |S_1 \cup S_2| > a = |S_1 \cap S_2| > 0$  and  $|\Omega| = D \rightarrow \infty$ . The limiting variance of the estimators from densification and improved densification when  $k = D \rightarrow \infty$  is given by:

$$\lim_{k \rightarrow \infty} \text{Var}(h) = \frac{a}{A} \left[ \frac{A-a}{A(A+1)} \right] > 0 \quad (15)$$

$$\lim_{k \rightarrow \infty} \text{Var}(h^+) = \frac{a}{A} \left[ \frac{3(A-1) + (2A-1)(a-1)}{2(A+1)(A-1)} - \frac{a}{A} \right] > 0 \quad (16)$$

**Proof:** When  $k = D$ , then  $N_{emp} = D - A$ . Substituting this value in the variance formulas from (Shrivastava & Li, 2014c) and taking the limit as  $D = k \rightarrow \infty$ , we get the above expression after manipulation. When  $0 < R = \frac{a}{A} < 1$ , they both are strictly positive.  $\square$

### Theorem 6

$$\text{Pr}(h^*(S_1) = h^*(S_2)) = \frac{|S_1 \cap S_2|}{|S_1 \cup S_2|} = R \quad (17)$$

$$\text{Var}(h^*) = \frac{R}{k} + A \frac{R}{k^2} + B \frac{R\tilde{R}}{k^2} - R^2 \quad (18)$$

$$\lim_{k \rightarrow \infty} \text{Var}(h^*) = 0 \quad (19)$$

where  $N_{emp}$  is the number of simultaneous empty bins between  $S_1$  and  $S_2$  and the quantities  $A$  and  $B$  are given by

$$A = \mathbb{E} \left[ 2N_{emp} + \frac{N_{emp}(N_{emp} - 1)}{k - N_{emp}} \right]$$

$$B = \mathbb{E} \left[ (k - N_{emp})(k - N_{emp} - 1) + 2N_{emp}(k - N_{emp} - 1) + \frac{N_{emp}(N_{emp} - 1)(k - N_{emp} - 1)}{k - N_{emp}} \right]$$

### Proof:

The collision probability is easy using a simple observation that values coming from different bin numbers can never match across  $S_1$  and  $S_2$ , i.e.  $h_i^*(S_1) \neq h_j^*(S_2)$  if  $i \neq j$ , as they have disjoint different range. So whenever, for a simultaneous empty bin  $i$ , i.e.  $E_i = 1$ , we get  $h_i^*(S_1) = h_i^*(S_2)$  after reassignment, the value must be coming from same non-empty bin, say numbers  $k$  which is not not empty. Thus,

$$\text{Pr}(h_i^*(S_1) = h_i^*(S_2)) = \text{Pr}(h_k^*(S_1) = h_k^*(S_2) | E_k = 0) = R \quad \text{By expansion and linearity of expectation, we obtain}$$

The variance is little involved. From the collision probability, we have the following is unbiased estimator.

$$\hat{R} = \frac{1}{k} \sum_{j=0}^{k-1} \mathbb{1}\{h_j^*(S_1) = h_j^*(S_2)\}. \quad (20)$$

For variance, define the number of simultaneously empty bins by

$$N_{emp} = \sum_{j=0}^{k-1} \mathbb{1}\{E_j = 1\}, \quad (21)$$

where  $\mathbb{1}$  is the indicator function. We partition the event  $(h_j^*(S_1) = h_j^*(S_2))$  into two cases depending on  $E_j$ . Let  $M_j^N$  (**Non-empty Match at  $j$** ) and  $M_j^E$  (**Empty Match at  $j$** ) be the events defined as:

$$M_j^N = \mathbb{1}\{E_j = 0 \text{ and } h_j^*(S_1) = h_j^*(S_2)\} \quad (22)$$

$$M_j^E = \mathbb{1}\{E_j = 1 \text{ and } h_j^*(S_1) = h_j^*(S_2)\} \quad (23)$$

Note that,  $M_j^N = 1 \implies M_j^E = 0$  and  $M_j^E = 1 \implies M_j^N = 0$ . From the LSH property of estimator we have

$$\begin{aligned} \mathbb{E}(M_j^N | E_j = 0) &= \mathbb{E}(M_j^E | E_j = 1) \\ &= \mathbb{E}(M_j^E + M_j^N) = R \quad \forall j \end{aligned} \quad (24)$$

It is not difficult to show that,

$$\mathbb{E}(M_j^N M_i^N | i \neq j, E_j = 0 \text{ and } E_i = 0) = R\tilde{R},$$

where  $\tilde{R} = \frac{a-1}{f_1 + f_2 - a - 1}$ . Using these new events, we have

$$\hat{R} = \frac{1}{k} \sum_{j=0}^{k-1} [M_j^E + M_j^N] \quad (25)$$

We are interested in computing

$$\text{Var}(\hat{R}) = \mathbb{E} \left( \left( \frac{1}{k} \sum_{j=0}^{k-1} [M_j^E + M_j^N] \right)^2 \right) - R^2 \quad (26)$$

For notational convenience we will use  $m$  to denote the event  $k - N_{emp} = m$ , i.e., the expression  $\mathbb{E}(\cdot | m)$  means  $\mathbb{E}(\cdot | k - N_{emp} = m)$ . To simplify the analysis, we will first compute the conditional expectation

$$f(m) = \mathbb{E} \left( \left( \frac{1}{k} \sum_{j=0}^{k-1} [M_j^E + M_j^N] \right)^2 \middle| m \right) \quad (27)$$

By expansion and linearity of expectation, we obtain

$$\begin{aligned} k^2 f(m) &= \mathbb{E} \left[ \sum_{i \neq j} M_i^N M_j^N \middle| m \right] + \mathbb{E} \left[ \sum_{i \neq j} M_i^E M_j^E \middle| m \right] \\ &+ \mathbb{E} \left[ \sum_{i \neq j} M_i^E M_j^N \middle| m \right] + \mathbb{E} \left[ \sum_{i=1}^k [(M_j^N)^2 + (M_j^E)^2] \middle| m \right] \end{aligned}$$

$M_j^N = (M_j^N)^2$  and  $M_j^E = (M_j^E)^2$  as they are indicator functions and can only take values 0 and 1. Hence,

$$\mathbb{E} \left[ \sum_{j=0}^{k-1} [(M_j^N)^2 + (M_j^E)^2] \middle| m \right] = kR \quad (28)$$

The values of the first three terms are given by the following 3 expression using simple binomial expansion and using the fact that we are dealing with indicator random variable which can only take values 0 or 1.

$$\mathbb{E} \left[ \sum_{i \neq j} M_i^N M_j^N \middle| m \right] = m(m-1)R\tilde{R} \quad (29)$$

$$\mathbb{E} \left[ \sum_{i \neq j} M_i^N M_j^E \middle| m \right] = 2m(k-m) \left[ \frac{R}{m} + \frac{(m-1)R\tilde{R}}{m} \right] \quad (30)$$

Let  $p$  be the probability that two simultaneously empty bins  $i$  and  $j$  finally picks the same non-empty bin for reassignment. Then we have

$$\mathbb{E} \left[ \sum_{i \neq j} M_i^E M_j^E \middle| m \right] = (k-m)(k-m-1) [pR + (1-p)R\tilde{R}] \quad (31)$$

because with probability  $(1-p)$ , it uses estimators from different simultaneous non-empty bin and in that case the  $M_i^E M_j^E = 1$  with probability  $R\tilde{R}$ . We know that Algorithm 1 which uses 2-universal hashing the value of  $p = \frac{1}{m}$ . This is because any pairwise assignment is perfectly random with 2-universal hashing.

Substituting for all terms with value of  $p$  and rearranging terms gives the required expression.

When  $k = D$ , then  $N_{emp} = D - A$ . Substituting this value in the variance formulas and taking the limit as  $D = k \rightarrow \infty$ , we get 0 for all  $R$ .

### Theorem 7

$$\text{Var}(h^*) \leq \text{Var}(h^+) \leq \text{Var}(h) \quad (32)$$

**Proof:** We have  $p^* = \frac{1}{m} \leq p^+ = \frac{1.5}{m+1} \leq p = \frac{2}{m+1}$ . The value of  $p^+$  and  $p$  comes from analysis in (Shrivastava & Li, 2014c)

**Theorem 8** Among all densification schemes, where the reassignment process for bin  $i$  is independent of the reassignment process of any other bin  $j$ , Algorithm 1 achieves the best possible variance.

Under any independent re-assignment, the probability that two empty bins chooses the same non-empty bin out of  $m$  non-empty bins is lower bounded by  $\frac{1}{m}$  which is achieved by optimal densification.
